# Supplementary material
Source: PubMed Central journal article supplement (PMC6067934)
Supplement: supp_the2017-0361_onco12355-sup-0002-suppinfo02.pdf [file supp_the2017-0361_onco12355-sup-0002-suppinfo02.pdf]

Supplemental Tables for  
Validation and Refinement of the Age, Comorbidities, and Albumin index in Elderly Patients with Diffuse Large B-Cell Lymphoma: An Effective Tool for Comprehensive Geriatric Assessment  
Hui Liu et al.

**Table S1. Toxicities after therapy**

| Grade $\geq 3$ toxicities | ACA "excellent" group<br>(score 0, n=39) | ACA "good" group<br>(score 1, n = 31) | ACA "moderate to poor" group<br>(score $\geq 2$ , n =29) | <i>P</i> |
|---------------------------|------------------------------------------|---------------------------------------|----------------------------------------------------------|----------|
| Hematologic               | 22 (56.4)                                | 14 (45.2)                             | 18 (64.3)                                                | 0.330    |
| Gastrointestinal          | 1 (2.6)                                  | 2 (6.5)                               | 0 (0.0)                                                  | 0.490    |
| Pulmonary                 | 1 (2.6)                                  | 1 (3.2)                               | 0 (0.0)                                                  | 1.000    |
| Infectious                | 1 (2.6)                                  | 4 (12.9)                              | 9 (32.1)                                                 | 0.002    |
| Cardiovascular            | 0 (0.0)                                  | 1 (3.2)                               | 2 (7.1)                                                  | 0.188    |
| Nervous                   | 0 (0.0)                                  | 0 (0.0)                               | 1 (3.6)                                                  | 0.286    |

ACA index, Age, Comorbidities, and Albumin index  
Statistical significance was set at  $P < 0.05$ .

**Table S2. IACA index**

| Prognostic variables | IACA value |        |                  |
|----------------------|------------|--------|------------------|
|                      | 0          | 1      | 2                |
| IADL scale           | 8          | 6 to 7 | $\leq 5$         |
| ACA index            | Excellent  | Good   | Moderate to poor |

ACA index, Age, Comorbidities, and Albumin index; IADL, instrumental activities of daily living

\* low-risk, score 0; intermediate-risk, score 1 to 2; high-risk, score 3 to 4.
